# Supplementary material
Source: PubMed Central journal article supplement (PMC7902411)
Supplement: NIHMS1664144-supplement-supporting_information.pdf [file NIHMS1664144-supplement-supporting_information.pdf]

# Direct Observation of $\beta$ -barrel Intermediates in the Self-assembly of Toxic SOD1<sub>28-38</sub> and Absence in Non-toxic Glycine Mutants

Yunxiang Sun<sup>1,2\*</sup>, Junchao Huang<sup>1, 2</sup>, Xiangmei Duan<sup>1</sup> and Feng Ding<sup>2\*</sup>

<sup>1</sup> School of Physical Science and Technology, Ningbo University, Ningbo 315211, China

<sup>2</sup> Department of Physics and Astronomy, Clemson University, Clemson, SC 29634, United States

\*E-mail: [sunyunxiang@nbu.edu.cn](mailto:sunyunxiang@nbu.edu.cn), [fding@clemson.edu](mailto:fding@clemson.edu)

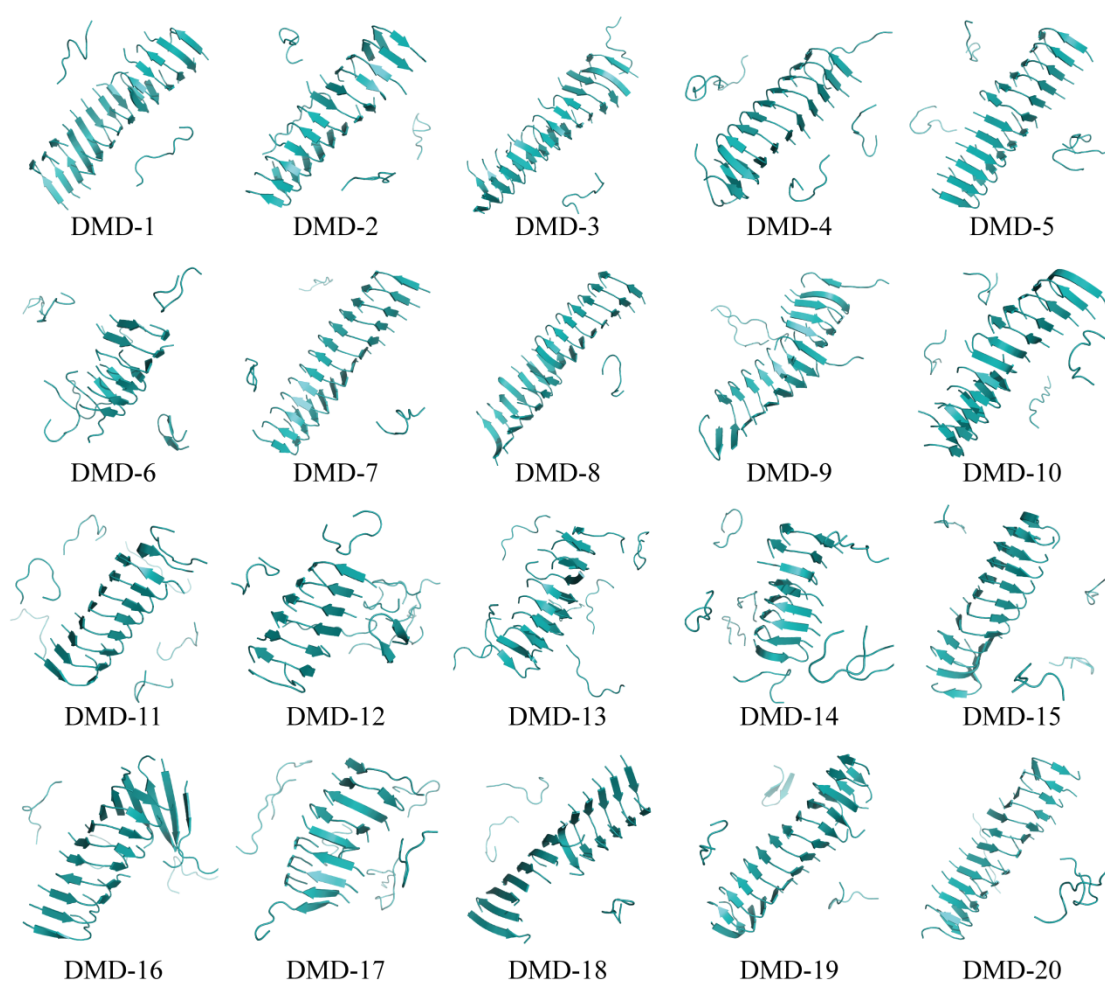

**Fig. S1.** The final assembled structures of SOD1<sub>28-38</sub> in each of the 20 independent DMD simulations for the 16-peptide system.

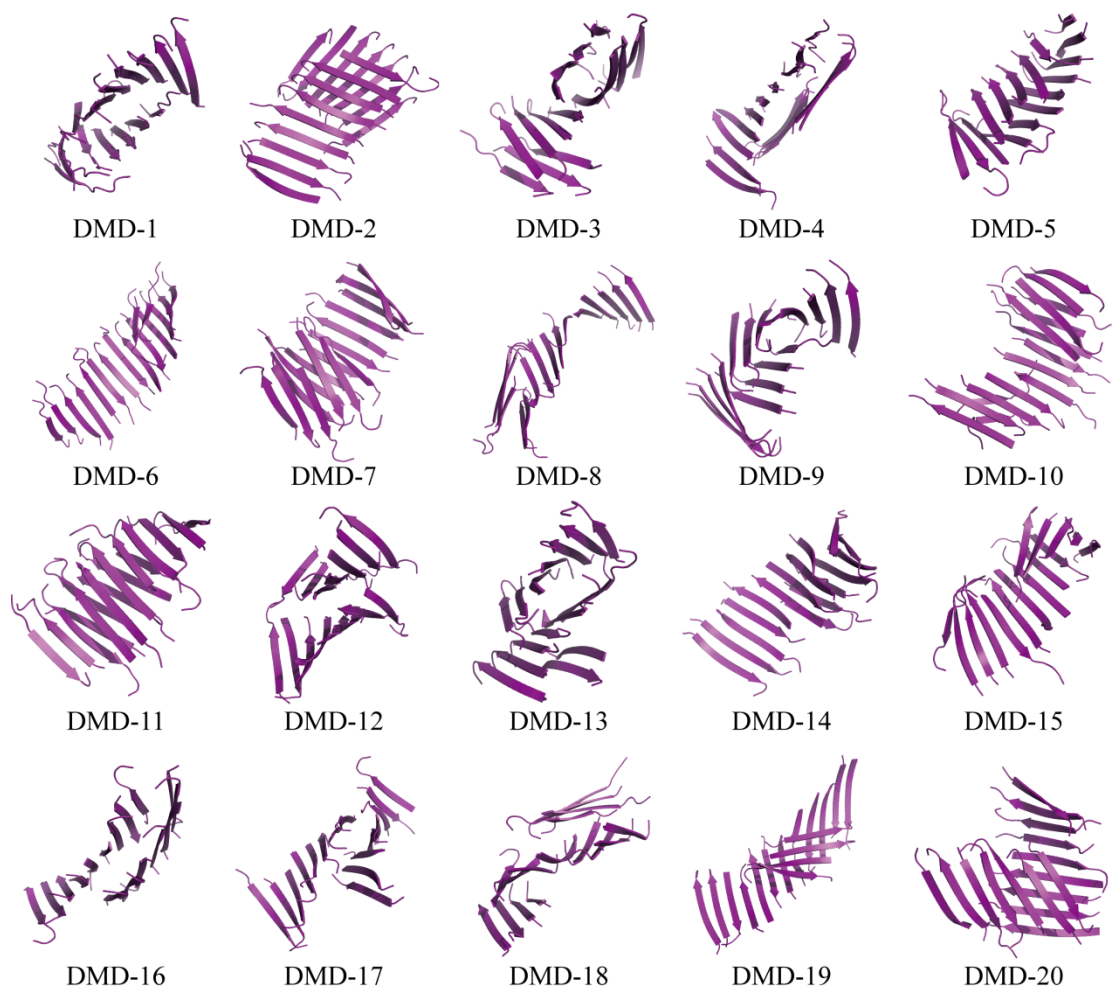

**Fig. S2.** The final assembled structures of SOD<sub>128-38</sub><sup>G33V</sup> in each of the 20 independent DMD simulations for the 16-peptide system.

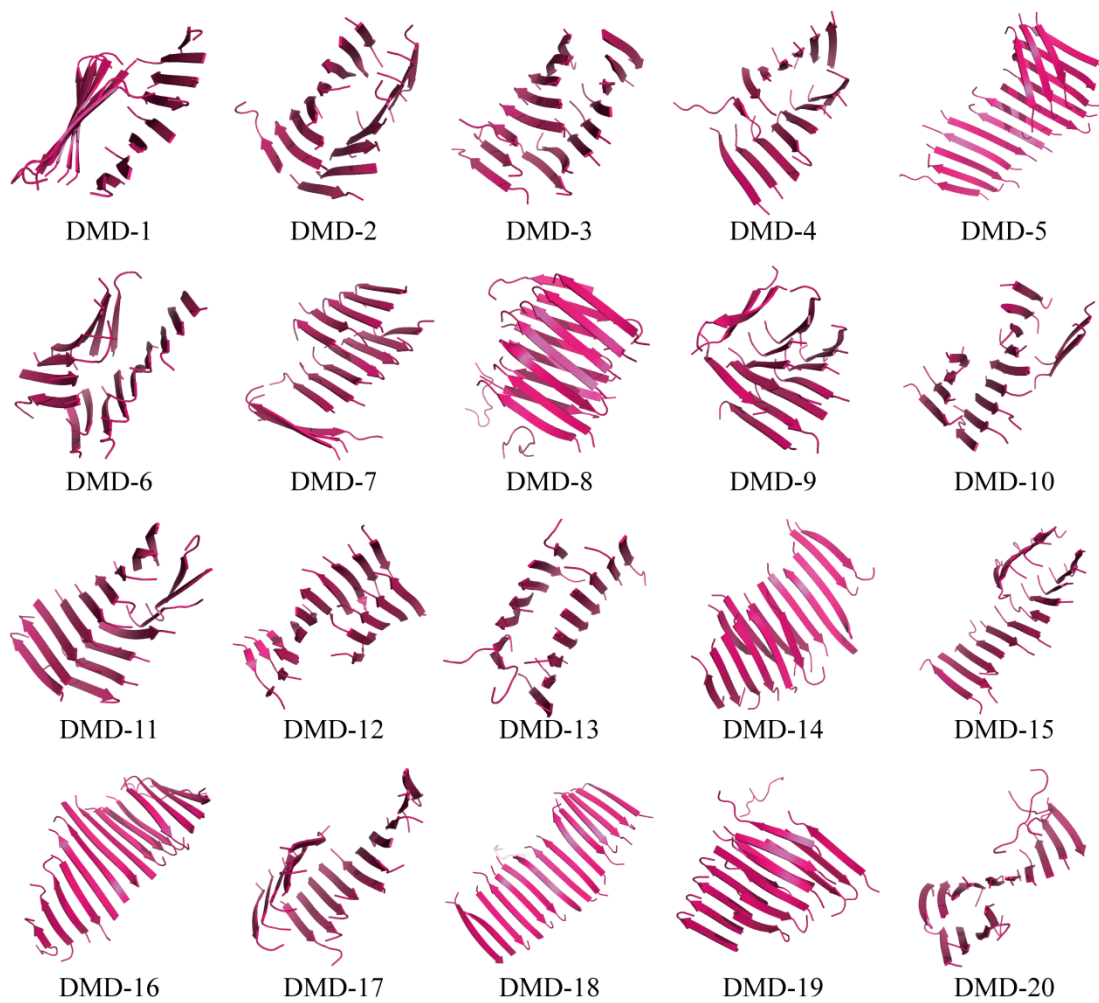

**Fig. S3.** The final assembled structures of  $\text{SOD1}_{28-38}^{\text{G33W}}$  in each of the 20 independent DMD simulations for the 16-peptide system.

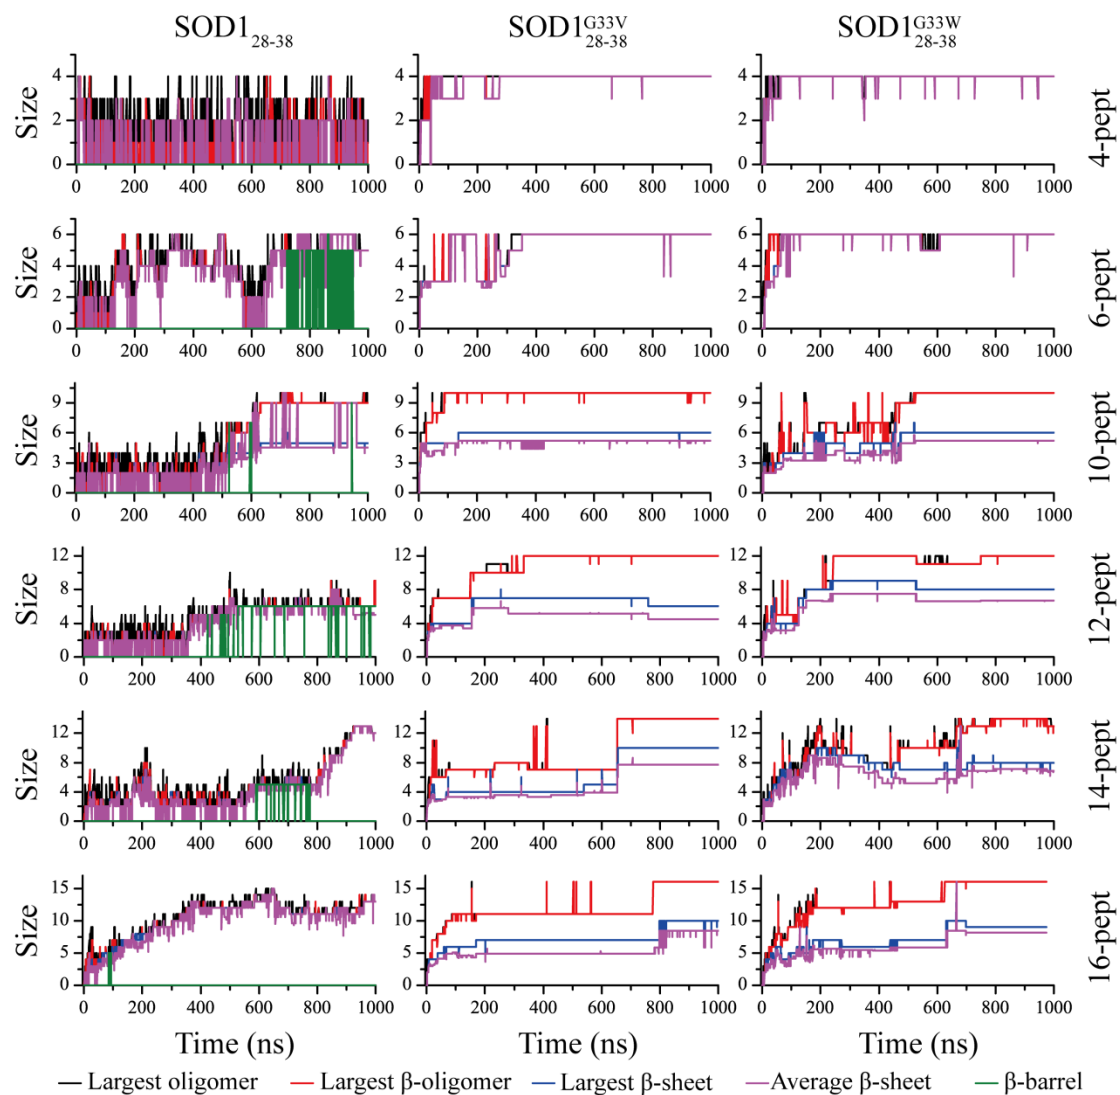

**Fig. S4. The self-assembly dynamics of different molecular systems.** The self-assembly dynamics of SOD<sub>128-38</sub> (left panel), SOD<sub>128-38</sub><sup>G33V</sup> (middle panel), and SOD<sub>128-38</sub><sup>G33W</sup> (right panel) peptides were monitored by the time evolution of the largest oligomer size (black), largest  $\beta$ -sheet oligomer size (red), largest  $\beta$ -sheet size (blue), averaged  $\beta$ -sheet layer size (purple) and  $\beta$ -barrel size (green). For each molecular system (the number of simulated peptides, labeled to the right), one representative trajectory was selected.

**Table S1.** The probability of  $\beta$ -barrel formation observed in each molecular system with different number of simulated peptides for each type of peptides. All independent simulation trajectories were included for the probability calculation.

| system | SOD1 <sub>28-38</sub> | SOD1 <sub>28-38</sub> <sup>G33V</sup> | SOD1 <sub>28-38</sub> <sup>G33w</sup> |
|--------|-----------------------|---------------------------------------|---------------------------------------|
| 4      | 0                     | 0                                     | 0                                     |
| 6      | 0.00849               | 0                                     | 0                                     |
| 8      | 0.00335               | 0                                     | 0                                     |
| 10     | 6.8E-4                | 0                                     | 0                                     |
| 12     | 0.02509               | 0                                     | 0                                     |
| 14     | 0.01536               | 0                                     | 0                                     |
| 16     | 0.01205               | 0                                     | 0                                     |
